# Supplementary material for: ESIPT and CHEF based highly sensitive and selective ratiometric sensor for Al3+ with imaging in human blood cells
Source: Royal Society of Chemistry journal article supplement (doi:10.1039/c5nj01468a), 2015-01-01
Supplement: c5nj01468a1.pdf [file c5nj01468a1.pdf]

## Supporting Information

### ESIPT and CHEF based highly sensitive and selective ratiometric sensor for Al<sup>3+</sup> with imaging in human blood cell

Sangita Das,<sup>a</sup> Shyamaprosad Goswami,<sup>\*a</sup> Krishnendu Aich,<sup>a</sup> Kakali Ghoshal,<sup>b</sup> Ching Kheng Quah,<sup>c</sup> Maitree Bhattacharya<sup>b</sup> and Hoong-Kun Fun<sup>c,d</sup>

<sup>a</sup> Department of Chemistry, Indian Institute of Engineering Science and Technology, Shibpur, Howrah-711 103, India. Fax: +91 33 2668 2916; Tel:+91 33 2668 2961-3; E-mail: [spgoswamical@yahoo.com](mailto:spgoswamical@yahoo.com).

<sup>b</sup> Department of Biochemistry, University of Calcutta, Kolkata – 700019, India.

<sup>c</sup> X-ray Crystallography Unit, School of Physics, Universiti Sains Malaysia, 11800 USM, Penang, Malaysia.

<sup>d</sup> Department of Pharmaceutical Chemistry, College of Pharmacy, King Saud University, Riyadh 11451, Saudi Arabia.

#### <sup>1</sup>H NMR, <sup>13</sup>C NMR and HRMS spectra:

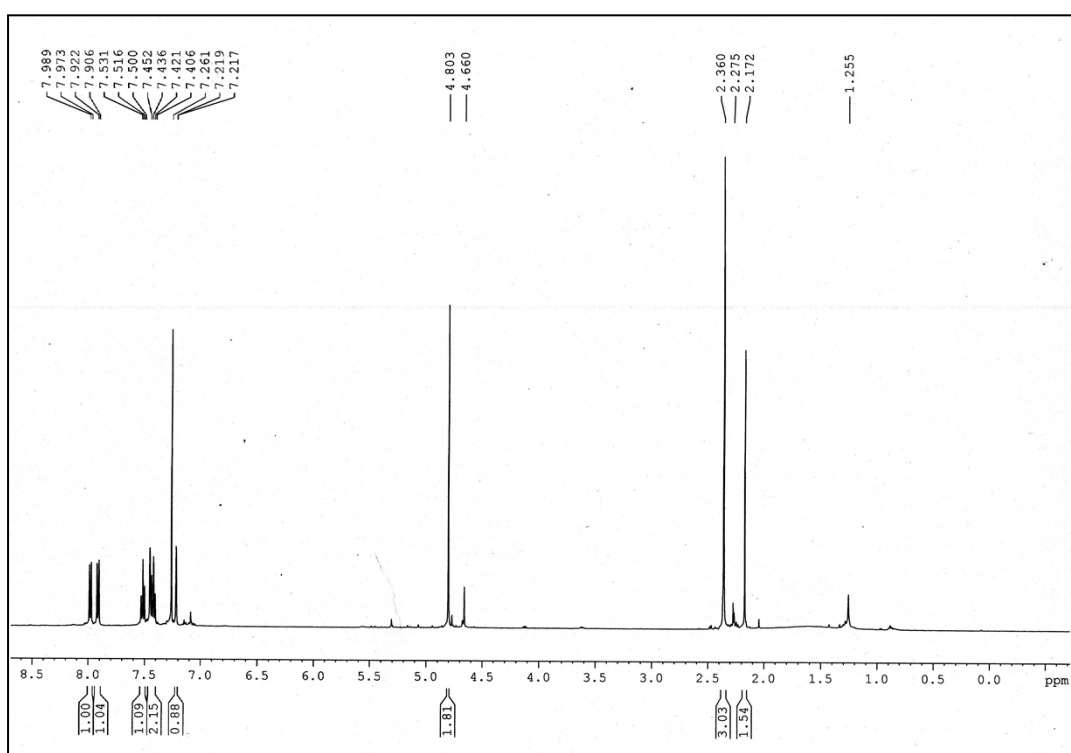

**Figure S1:** <sup>1</sup>H NMR (500 MHz) spectrum of compound 2 in CDCl<sub>3</sub>.

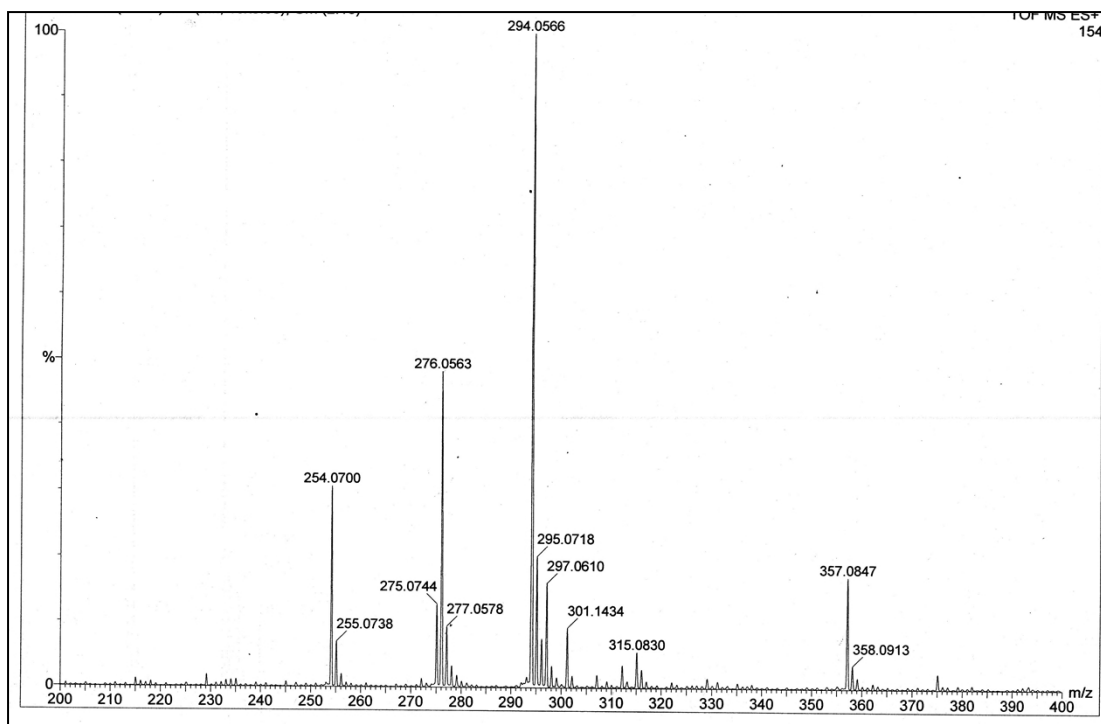

**Figure S2:** HRMS of compound 2.

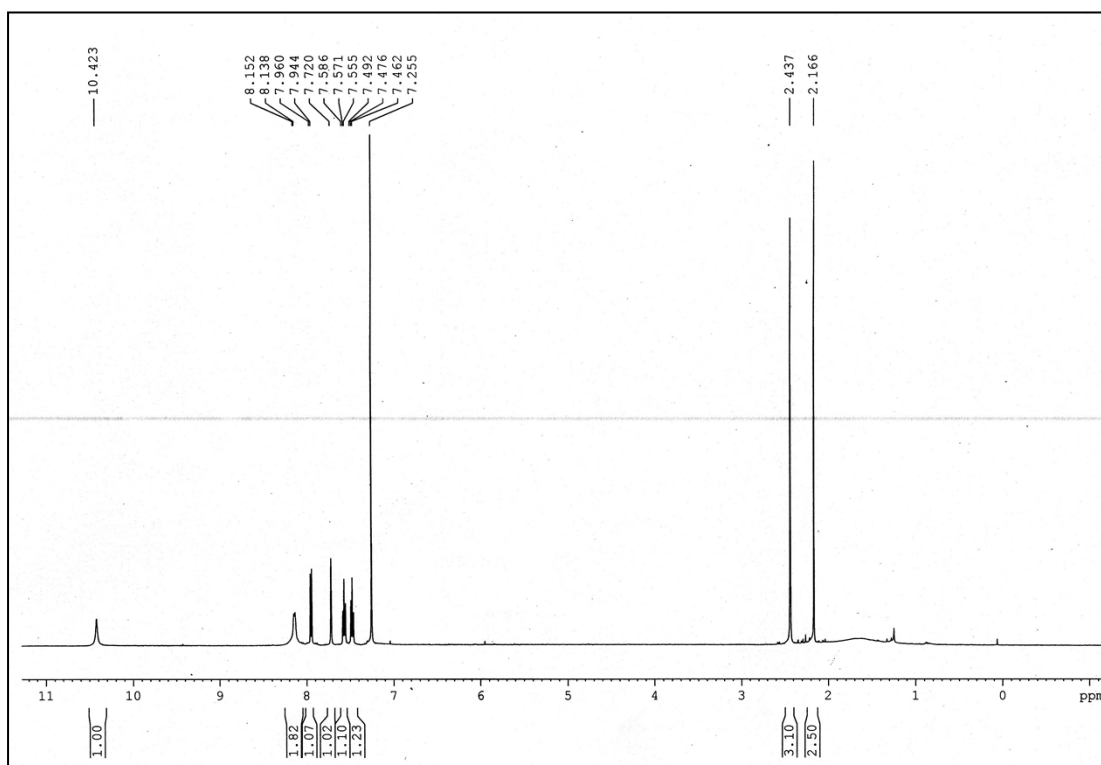

**Figure S3:** <sup>1</sup>H NMR (500 MHz) spectrum of compound 3 in CDCl<sub>3</sub>.

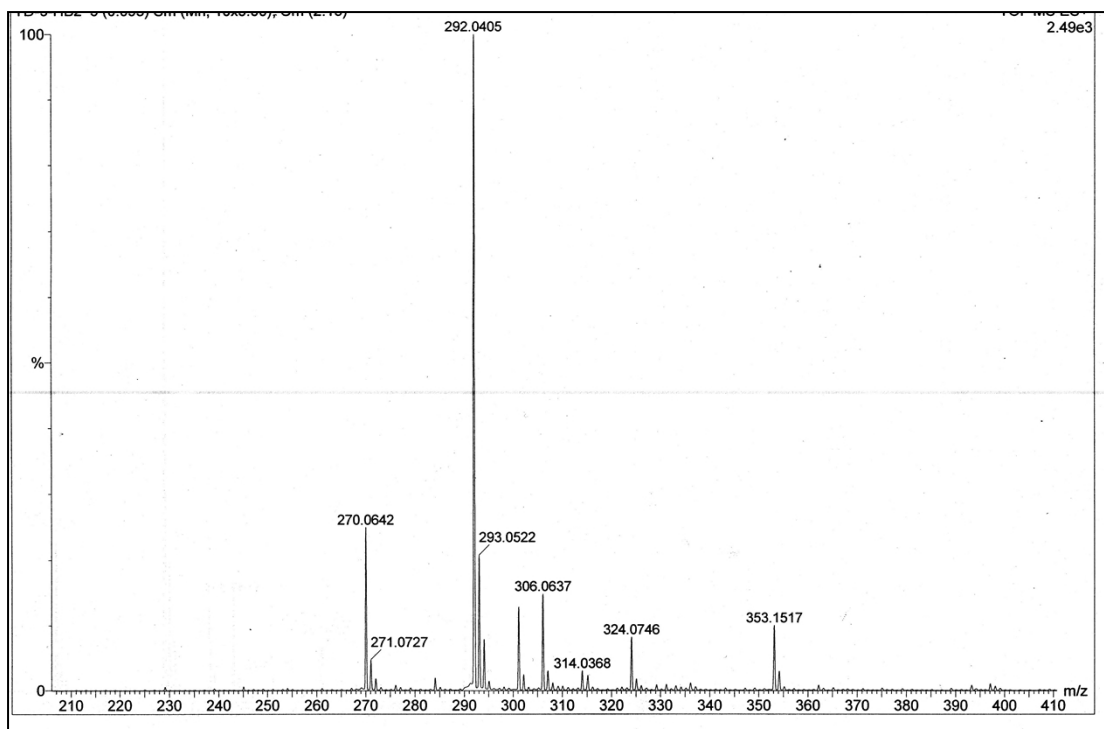

**Figure S4:** HRMS of compound 3

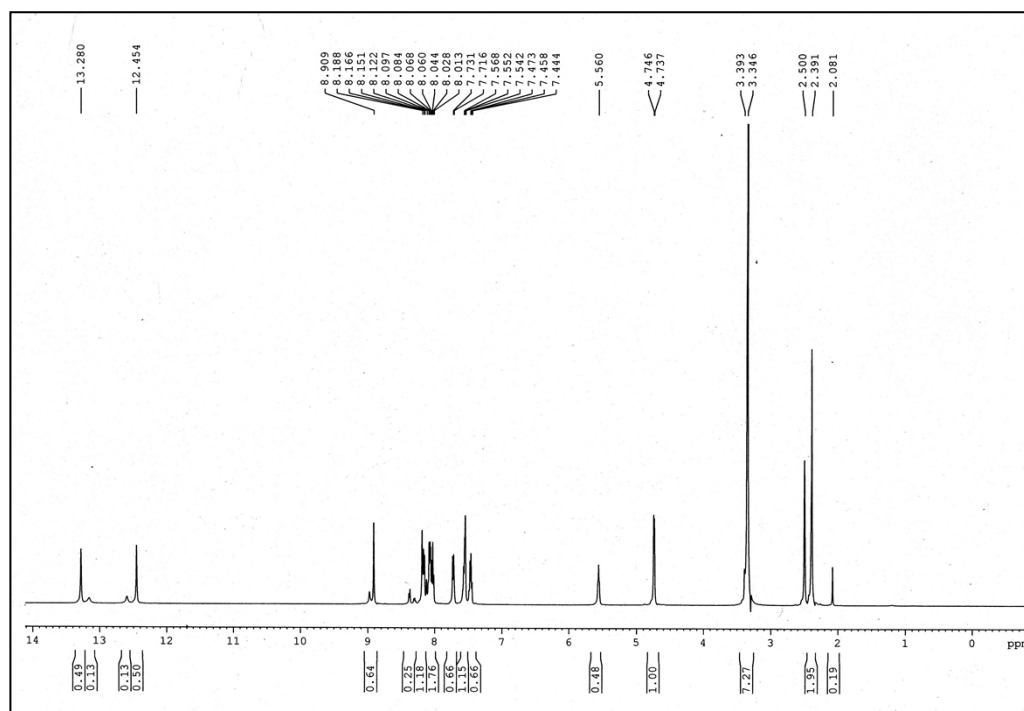

**Figure S5:** <sup>1</sup>H NMR (500 MHz) spectrum of HBTP in d<sub>6</sub>-DMSO.

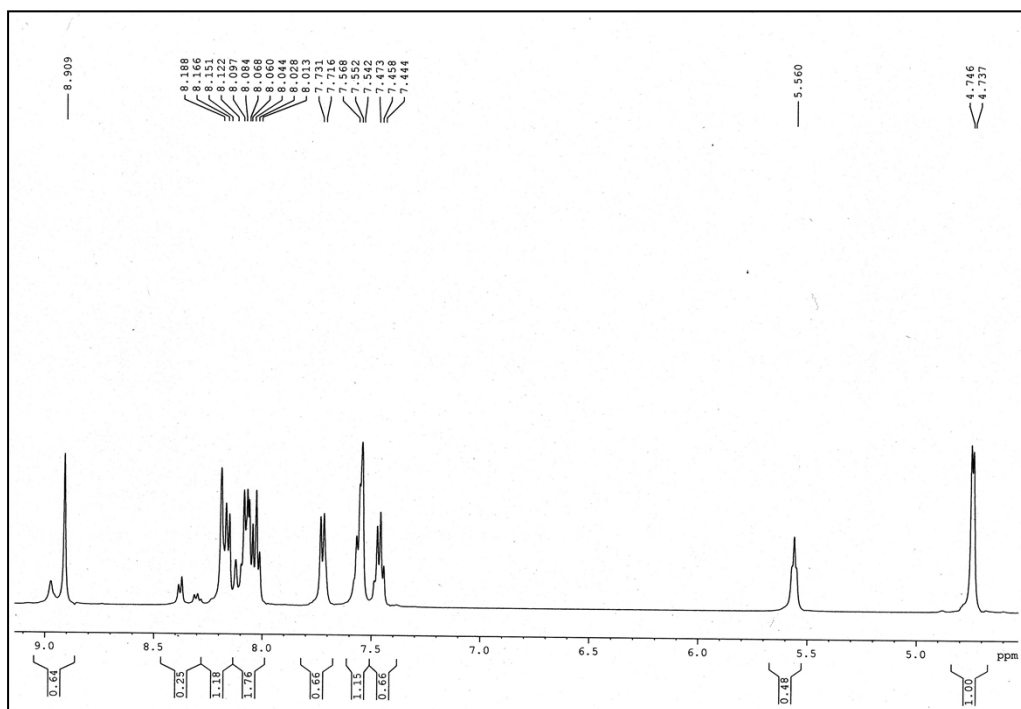

Figure S6:  $^1\text{H}$  NMR (500 MHz) spectrum of HBTP in  $d_6$ -DMSO (expansion).

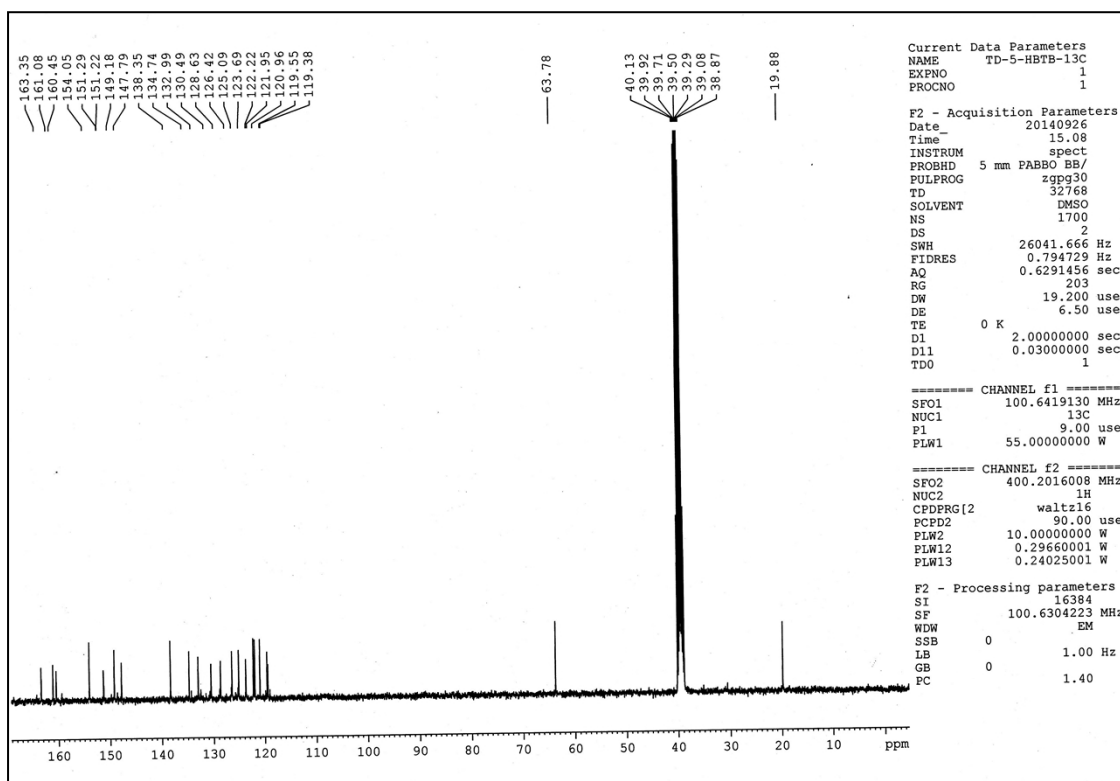

Figure S7:  $^{13}\text{C}$  NMR (125 MHz) spectrum of HBTP in  $d_6$ -DMSO.

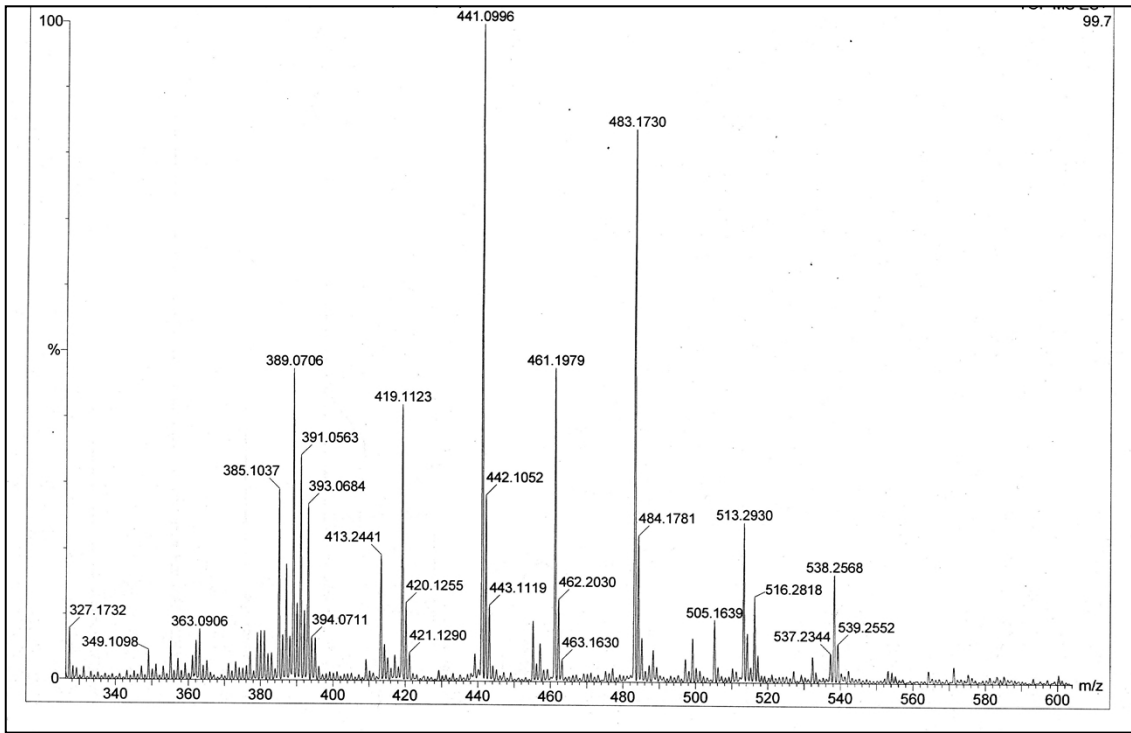

Figure S8: HRMS of HBTP

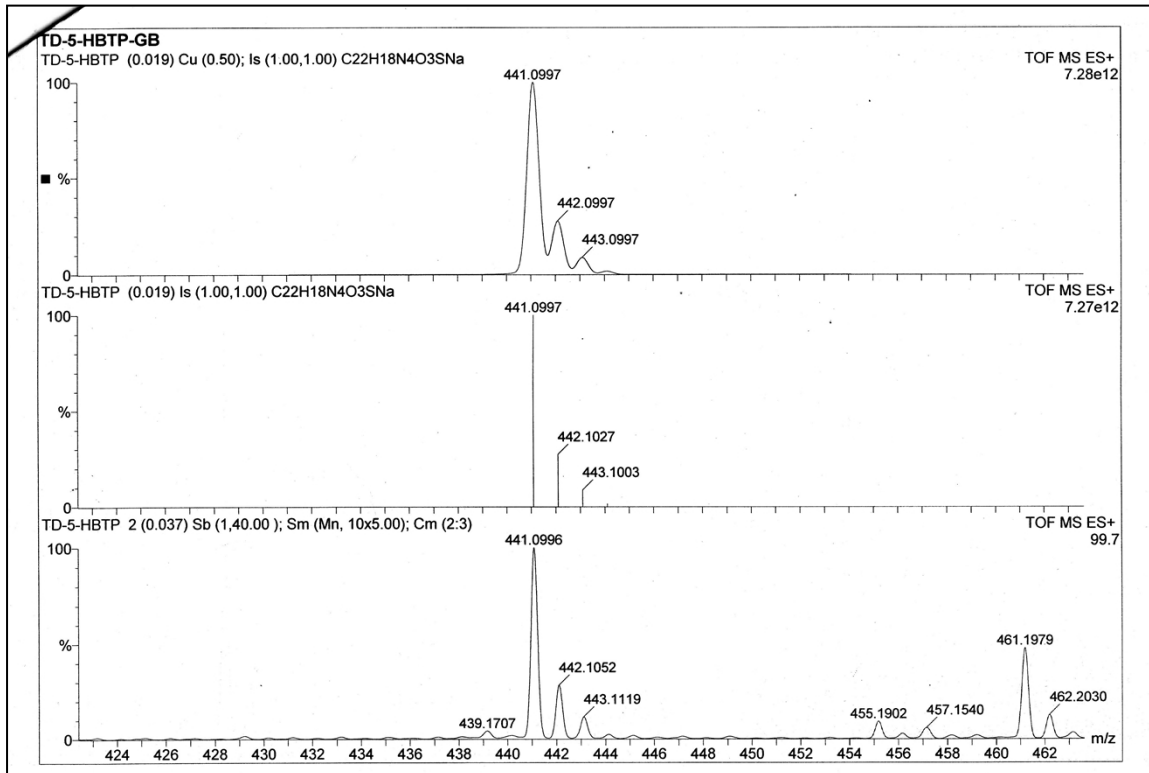

Figure S9: HRMS of HBTP (expansion)

### X-ray crystal structure analysis:

A yellow, block shaped single crystal of the HBTP, with dimensions of 0.360 mm x 0.211 mm x 0.075 mm, was chosen and its X-ray analysis was done using Apex II Duo CCD diffractometer with fine-focus sealed tube graphite-monochromated Mo  $K\alpha$  radiation ( $\lambda = 0.71073 \text{ \AA}$ ) at room temperature. The data was processed with SAINT and corrected for absorption using SADABS<sup>1</sup>. The structure was solved by direct method using the program SHELXTL<sup>2</sup> and was refined by full-matrix least squares technique on  $F^2$  using anisotropic displacement parameters for all non-hydrogen atoms. The non-hydrogen atoms were refined anisotropically. In **HBTP**, the N-bound and O-bound hydrogen atoms were located in a difference Fourier map and were fixed to their parent atoms with  $U_{\text{iso}}(\text{H}) = 1.2 U_{\text{eq}}(\text{N})$  or  $1.5 U_{\text{eq}}(\text{O})$  [N—H = 0.8535  $\text{\AA}$ ; O—H = 0.8173 or 0.8250  $\text{\AA}$ ]. The remaining C-bound H atoms were calculated geometrically with isotropic displacement parameters set to 1.2 (1.5 for methyl groups) times the equivalent isotropic  $U$  values of the parent carbon atoms [C—H = 0.93 or 0.96  $\text{\AA}$ ]. A rotating group model was used for methyl groups. Crystallographic data has been deposited at the Cambridge Crystallographic Data Centre with CCDC 1045374 (**HBTP**). Copies of the data can be obtained free of charge on application to the CCDC, 12 Union Road, Cambridge CB2 1EZ, UK. Fax: +44-(0)1223-336033 or e-mail: [deposit@ccdc.cam.ac.uk](mailto:deposit@ccdc.cam.ac.uk)

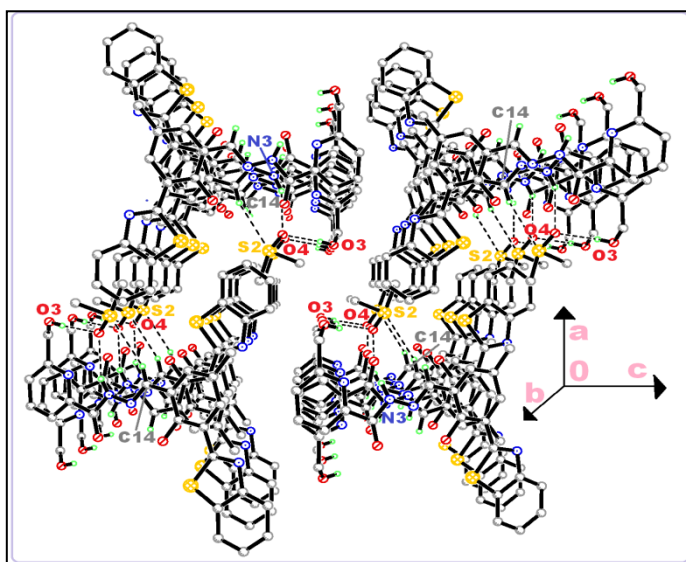

**Figure S10:** Crystal packing of **HBTP**, showing the molecules are stacked along the  $b$  axis. H atoms not involved in intermolecular interactions (dashed lines) have been omitted for clarity.

Table S1 Experimental details

| Crystal data                                                                                                   |                                                                                                  |
|----------------------------------------------------------------------------------------------------------------|--------------------------------------------------------------------------------------------------|
| Compound                                                                                                       | HBTP (CCDC 1045374)                                                                              |
| Chemical formula                                                                                               | C <sub>22</sub> H <sub>18</sub> N <sub>4</sub> O <sub>3</sub> S·C <sub>2</sub> H <sub>6</sub> OS |
| <i>M</i> <sub>r</sub>                                                                                          | 496.59                                                                                           |
| Crystal system, space group                                                                                    | Orthorhombic, <i>Pbca</i>                                                                        |
| Temperature (K)                                                                                                | 294                                                                                              |
| <i>a</i> , <i>b</i> , <i>c</i> (Å)                                                                             | 23.177 (5), 8.5606 (17), 23.924 (5)                                                              |
| <i>V</i> (Å <sup>3</sup> )                                                                                     | 4746.9 (17)                                                                                      |
| <i>Z</i>                                                                                                       | 8                                                                                                |
| Radiation type                                                                                                 | Mo <i>K</i> α                                                                                    |
| μ (mm <sup>-1</sup> )                                                                                          | 0.26                                                                                             |
| Crystal size (mm)                                                                                              | 0.36 × 0.21 × 0.08                                                                               |
| Data collection                                                                                                |                                                                                                  |
| Diffractometer                                                                                                 | Bruker <i>SMART APEX II</i> DUO CCD area-detector diffractometer                                 |
| Absorption correction                                                                                          | Multi-scan<br>( <i>SADABS</i> ; Bruker, 2009)                                                    |
| <i>T</i> <sub>min</sub> , <i>T</i> <sub>max</sub>                                                              | 0.911, 0.981                                                                                     |
| No. of measured, independent and observed [ <i>I</i> > 2σ( <i>I</i> )] reflections                             | 20862, 4898, 2126                                                                                |
| <i>R</i> <sub>int</sub>                                                                                        | 0.107                                                                                            |
| (sin θ/λ) <sub>max</sub> (Å <sup>-1</sup> )                                                                    | 0.628                                                                                            |
| Refinement                                                                                                     |                                                                                                  |
| <i>R</i> [ <i>F</i> <sup>2</sup> > 2σ( <i>F</i> <sup>2</sup> )], <i>wR</i> ( <i>F</i> <sup>2</sup> ), <i>S</i> | 0.062, 0.212, 0.96                                                                               |
| No. of reflections                                                                                             | 4898                                                                                             |
| No. of parameters                                                                                              | 310                                                                                              |
| H-atom treatment                                                                                               | H-atom parameters constrained                                                                    |
| Δρ <sub>max</sub> , Δρ <sub>min</sub> (e Å <sup>-3</sup> )                                                     | 0.28, -0.23                                                                                      |

**Table S2** Hydrogen-bond geometry (Å, °)

| <i>D</i> — <i>H</i> ⋯ <i>A</i>   | <i>D</i> — <i>H</i> | <i>H</i> ⋯ <i>A</i> | <i>D</i> ⋯ <i>A</i> | <i>D</i> — <i>H</i> ⋯ <i>A</i> |
|----------------------------------|---------------------|---------------------|---------------------|--------------------------------|
| <b>O1—H1O1⋯N2</b>                | 0.82                | 1.83                | 2.575 (4)           | 152                            |
| <b>O3—H1O3⋯O4</b>                | 0.83                | 2.02                | 2.836 (5)           | 171                            |
| <b>N3—H1N3⋯O4</b>                | 0.85                | 2.31                | 3.106 (5)           | 155                            |
| <b>C14—H14A⋯S2</b>               | 0.93                | 2.83                | 3.693 (5)           | 155                            |
| <b>C24—H24B ⋯Cg1<sup>i</sup></b> | 0.96                | 2.94                | 3.784(5)            | 148                            |

Symmetry code: (i)  $1/2+x,y,1/2-z$

\* Cg1 is the centroid of benzene ring (C1-C6).

### Determination of Association Constant ( $K_a$ ):

#### By UV-vis method:

Association constant was calculated according to the Benesi-Hildebrand equation.  $K_a$  was calculated following the equation stated below.

$$1/(A-A_0) = 1/\{K(A_{\max}-A_0) [M^{X^+}]^n\} + 1/[A_{\max}-A_0]$$

Here  $A_0$  is the absorbance of receptor in the absence of guest,  $A$  is the absorbance recorded in the presence of added guest,  $A_{\max}$  is absorbance in presence of added  $[M^{X^+}]_{\max}$  and  $K_a$  is the association constant, where  $[M^{X^+}]$  is  $[Al^{3+}]$ . The association constant ( $K_a$ ) could be determined from the slope of the straight line of the plot of  $1/(A-A_0)$  against  $1/[Al^{3+}]$  and is found to be  $1.24 \times 10^5 \text{ M}^{-1}$ .

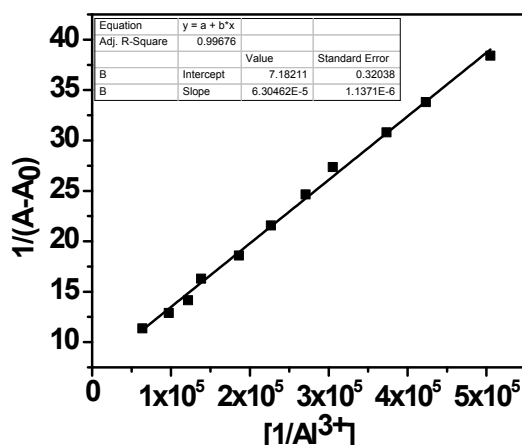

**Figure S11:** Benesi-Hildebrand plot from absorption titration data of receptor (10  $\mu\text{M}$ ) with  $Al^{3+}$ .

#### Determination of detection limit:

The detection limit (DL) of **HBTP** for  $Al^{3+}$  was determined from the following equation:

$$DL = K \cdot S_{b1} / S$$



Where  $K = 2$  or  $3$  (we take  $3$  in this case);  $Sb_1$  is the standard deviation of the blank solution;  $S$  is the slope of the calibration curve.

**By fluorescence method:**

From the graph, we get slope =  $347248.167$ , and  $Sb_1$  value is  $0.00778$

Thus using the formula we get the Detection Limit =  $6.72 \times 10^{-8}$  M i.e. HBTP can detect  $Al^{3+}$  in this minimum concentration through fluorescence method.

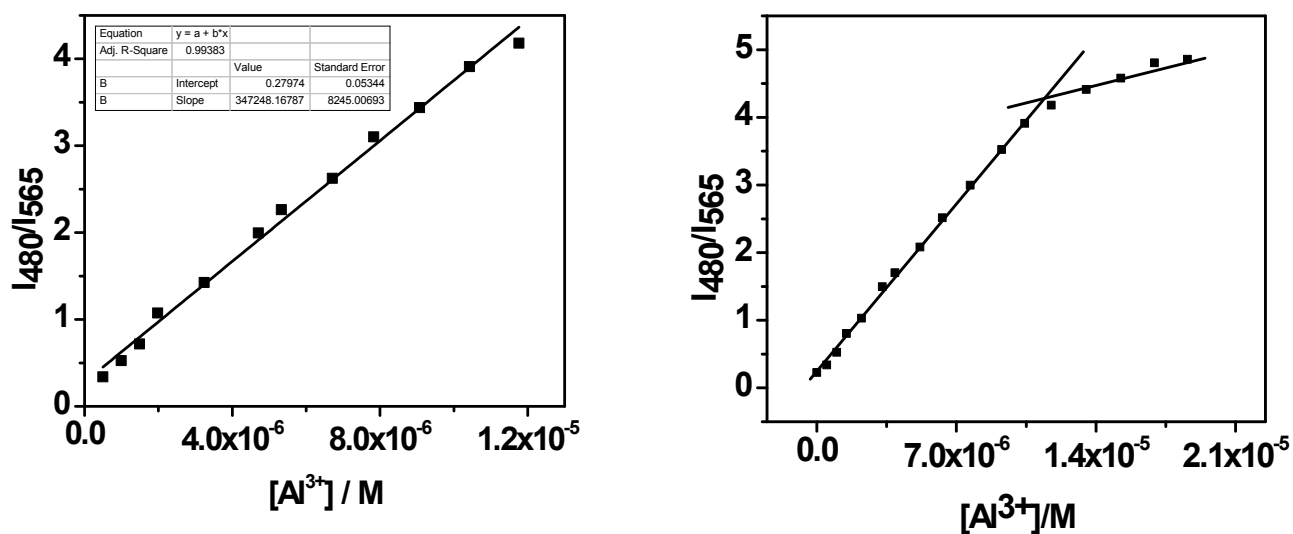

**Figure S12:** The linear response curve of emission ratio ( $I_{480}/I_{560}$ ) depending on the  $Al^{3+}$  concentration.

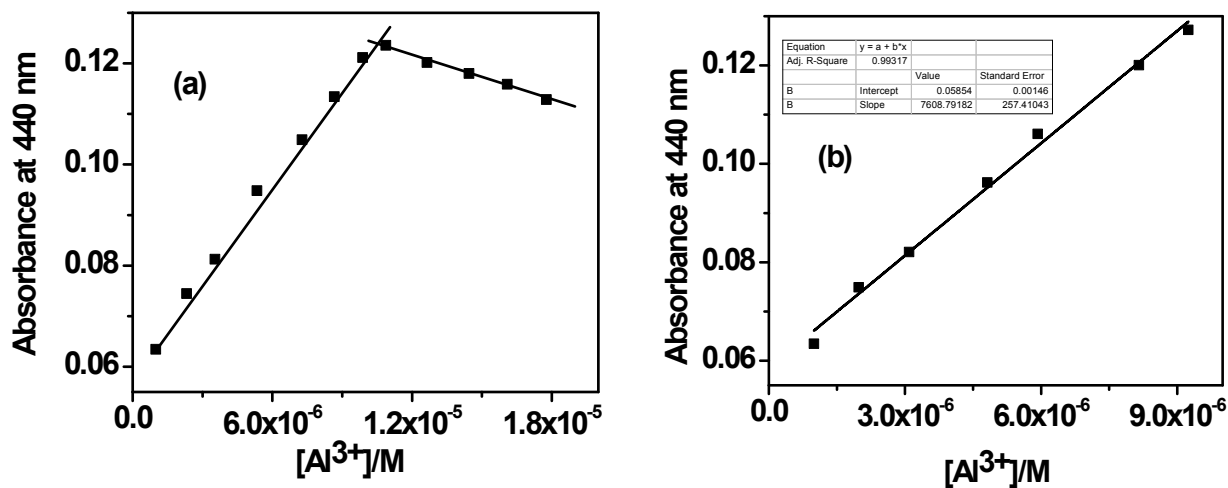

**Figure S13:** The linear response curve of HBTP with  $\text{Al}^{3+}$  concentration (440 nm).

**General procedure for drawing Job's plot by fluorescence method:**

Stock solution of same concentration of sensor and  $\text{Al}^{3+}$  were prepared in the order of  $10\ \mu\text{M}$  in  $[\text{CH}_3\text{OH}/\text{H}_2\text{O}, 1/9, \text{v/v}]$  (at  $25\ ^\circ\text{C}$ ) at pH 7.3 in PBS buffer. The emission spectrum in each case with different *host-guest* ratio but equal in volume was recorded. Job's plots were drawn by plotting  $\Delta I \cdot X_{\text{host}}$  vs  $X_{\text{host}}$  ( $\Delta I$  = change of intensity of the emission spectrum at 480 nm during titration and  $X_{\text{host}}$  is the mole fraction of the host in each case, respectively).

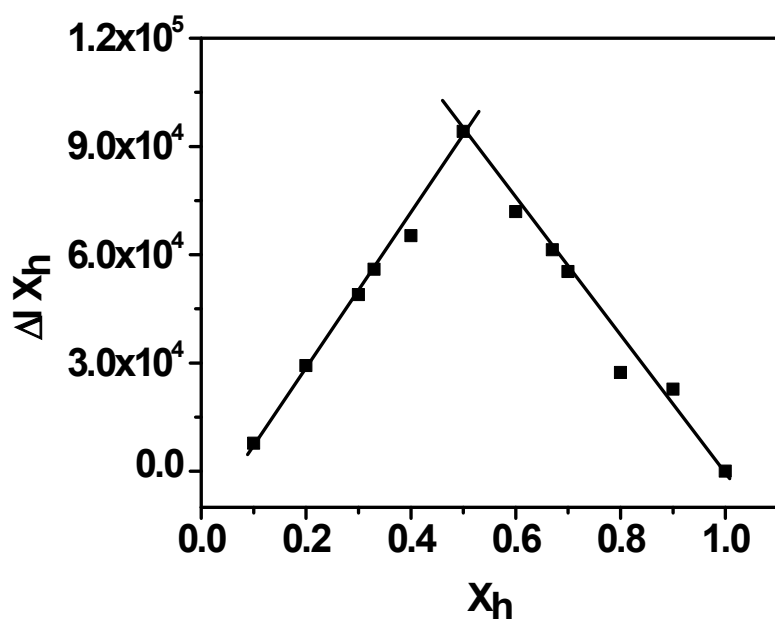

**Figure S14:** Job's plot diagram of receptor for  $\text{Al}^{3+}$  (where  $X_h$  is the mole fraction of the host and  $\Delta I$  indicates the change of emission intensity at 480 nm)

### Competition study:

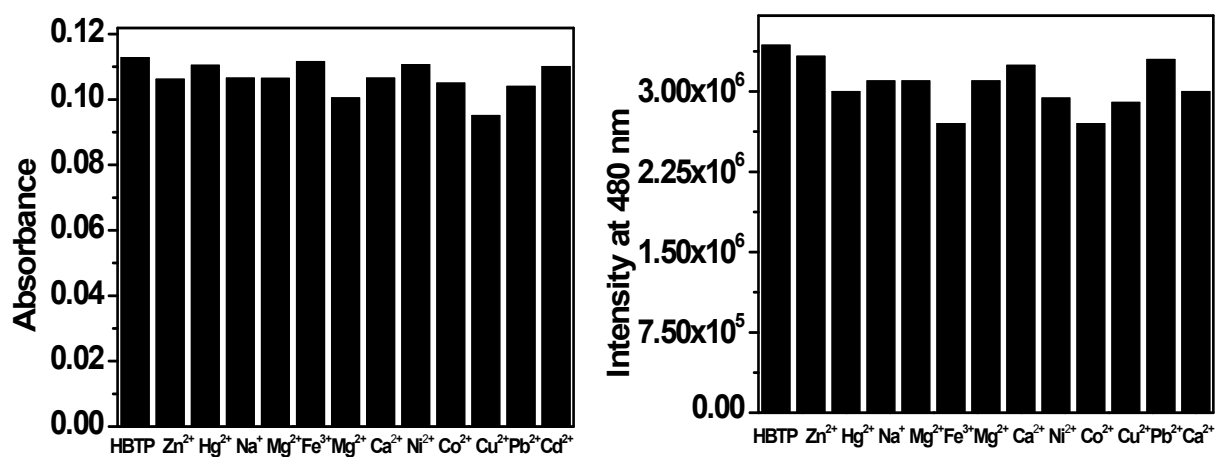

**Figure S15:** Competition study using (a) UV-vis and (b) Fluorescence method, after addition of different analytes (30  $\mu\text{M}$ ) in the solution of HBTP (10  $\mu\text{M}$ ) in presence of  $\text{Al}^{3+}$  (20  $\mu\text{M}$ ).

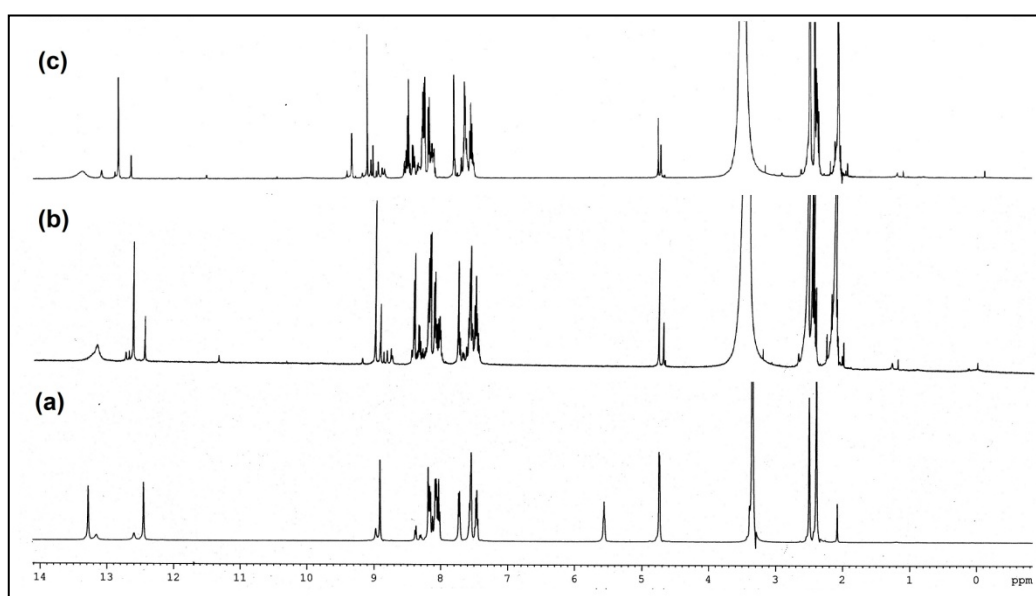

**Figure S16.** Partial  $^1\text{H}$  NMR (400 MHz) spectra of (a) HBTP ( $4.7 \times 10^{-3}$  M), (b)  $[\text{HBTP}+\text{Al}^{3+}$  ( $2.4 \times 10^{-3}$  M)] and (c)  $[\text{HBTP}+\text{Al}^{3+}$  ( $4.8 \times 10^{-3}$  M)] in  $\text{d}_6$  DMSO.

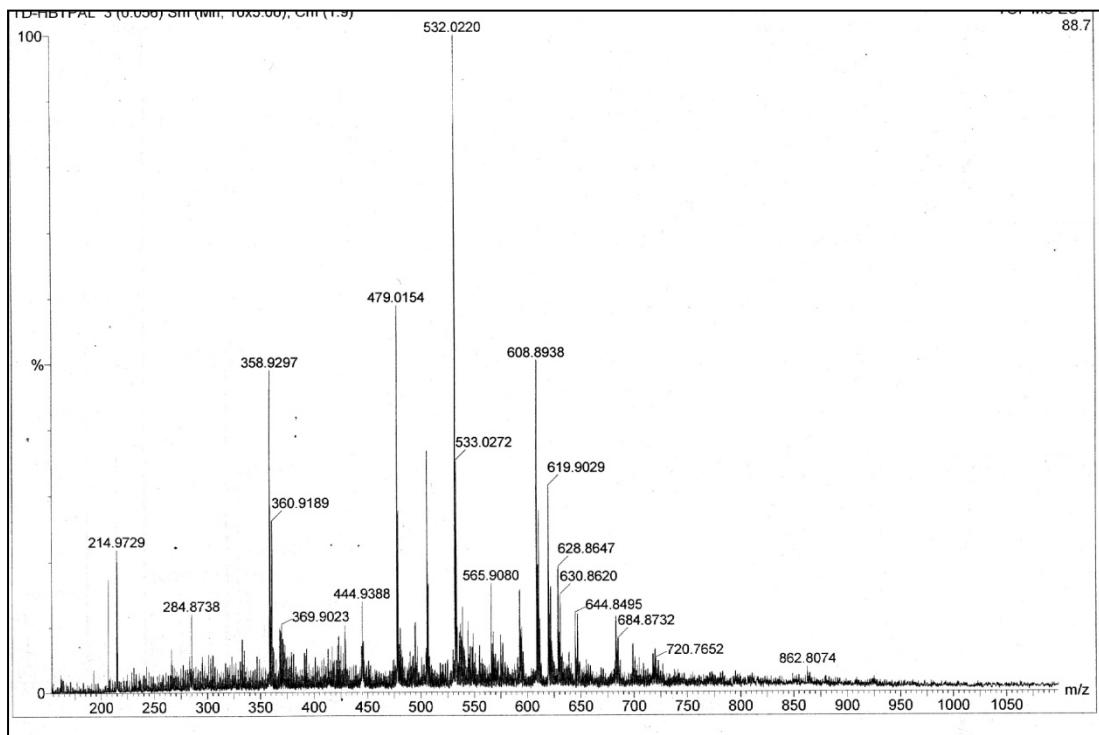

**Figure S17:** HRMS of  $\text{HBTP}-\text{Al}^{3+}$  complex.

pH study:

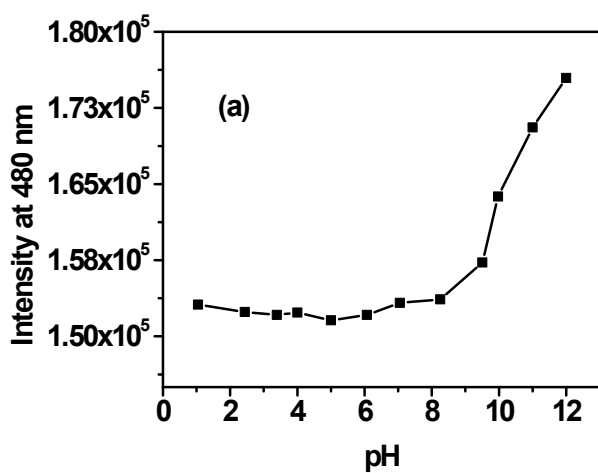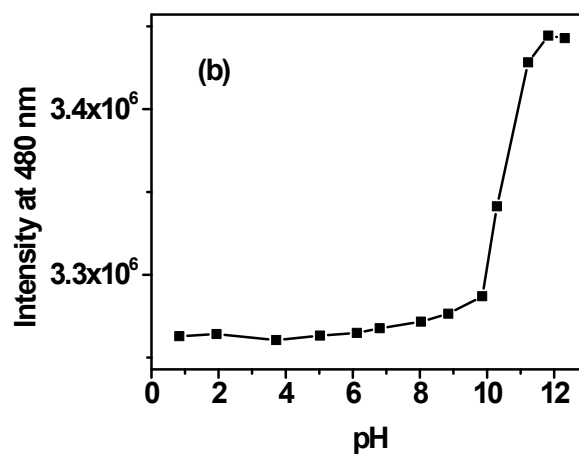

**Figure S18:** Fluorescence response of (a) HBTP and (b) HBTP-Al<sup>3+</sup> at 480 nm (10 μM) as a function of pH in CH<sub>3</sub>OH/ H<sub>2</sub>O (1/ 9, v/v), pH is adjusted by using aqueous solutions of 1 M HCl or 1 M NaOH.

### Details of live-cell imaging

#### Materials Methods

3 ml of venous blood was obtained from volunteer donor (age > 30 years) with his informed consent. Peripheral blood mononuclear cells (PBMCs) were isolated by density gradient centrifugation by histopaque-1077 obtained by SIGMA. PBMCs were washed and suspended in PBS and were divided in two sets. In one set, 10 μM Al(NO<sub>3</sub>)<sub>3</sub> solution was added as a source of Al<sup>3+</sup>. Another set was devoid of any externally added Al<sup>3+</sup>. HBTP samples were prepared in PBS containing 0.5% DMSO. Both the samples were incubated with 10 μM HBTP solutions for 15 minutes at 37°C. Cells were observed under confocal fluorescence microscope (Olympus IX81 microscope) with fluorescence emissions at 480 nm and 560 nm, respectively.

**Table S3:** Average red/green fluorescence intensity in human PBMCs treated with HBTP with and without Al<sup>3+</sup>

|                      | Red fluorescence intensity | Green fluorescence intensity | Green : Red ratio |
|----------------------|----------------------------|------------------------------|-------------------|
| -ve Al <sup>3+</sup> | 4099                       | 187                          | 0.046             |
| +ve Al <sup>3+</sup> | 581                        | 3602                         | 6.2               |

#### MTT assay:

To determine cell viability against HBTP, PBMCs were treated with different concentrations of HBTP solution (5-50 μM) with or without Al<sup>3+</sup> (10 μM) for 1 hour at 37°C against control cell suspension with no added HBTP. Cell density remains 10<sup>6</sup> cells per well in a 96- well plate. 100 μl of MTT solution (5 mg/ml) was added to each well including control and incubated for 4 hours at 37°C. The purple colored formazan crystals were dissolved with 100 μl DMSO and the absorbance were measured at 570 nm. Cell viability was calculated using the following calculation:

$$\% \text{ of Cell Viability} = \frac{(\text{Absorbance of treatment group} - \text{blank})}{(\text{Absorbance of control group} - \text{blank})} \times 100$$

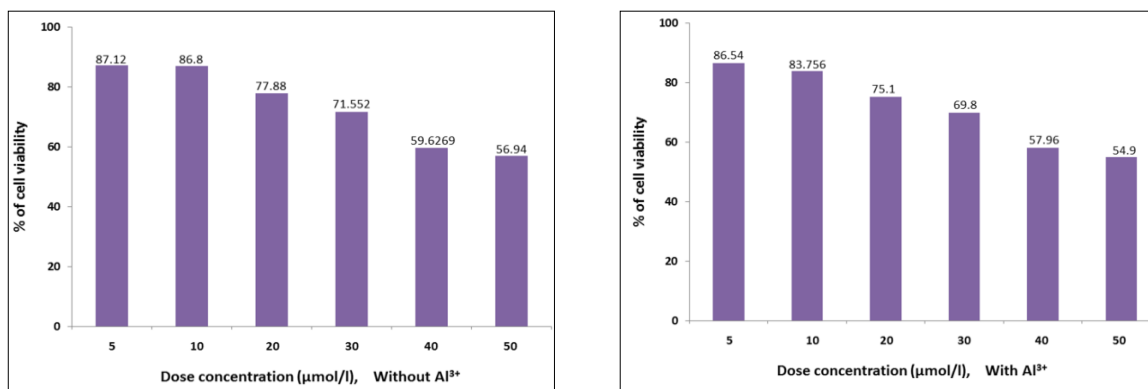

**Figure S19:** Percentage of viable cells over HBTP concentration range (5-50 μM) presence and absence of Al<sup>3+</sup>.

### Result:

Cell viability was represented in Figure S18, where up to 50 μmol/l concentrations of HBTP shows around 57% & 55% of viable cells respectively predicting it is a safe probe to use in a biological system. We have used 20 μmol/l HBTP solutions for imaging which shows fairly high number of viable cells (77.88% without Al<sup>3+</sup> and 75.1% with Al<sup>3+</sup>) concluding its nontoxic nature.

### The emission change of HBTP after addition of Al<sup>3+</sup> in DMSO solution:

The fluorescence titration of HBTP (10 μM) in DMSO with increasing concentration of Al<sup>3+</sup> showed similar characteristic as that of in methanol/H<sub>2</sub>O (1/9) solution. This observation indicates that the probe is similar effective in both the solution (aqueous solution and DMSO) to detect Al<sup>3+</sup>.

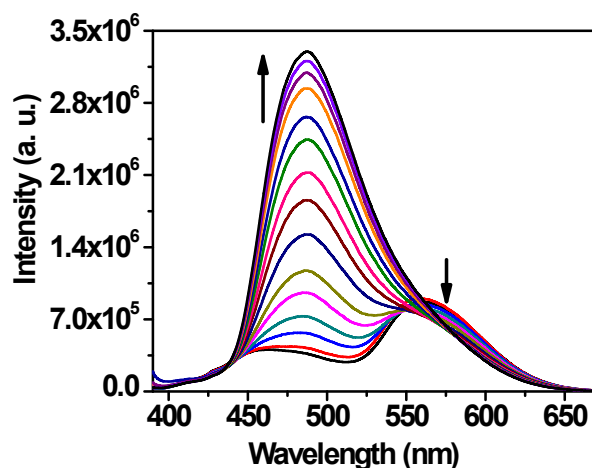

**Figure S20:** Fluorescence spectra of HBTP (10  $\mu\text{M}$ ) upon titration with  $\text{Al}^{3+}$  (0 to 3 equivalents) in DMSO solution.

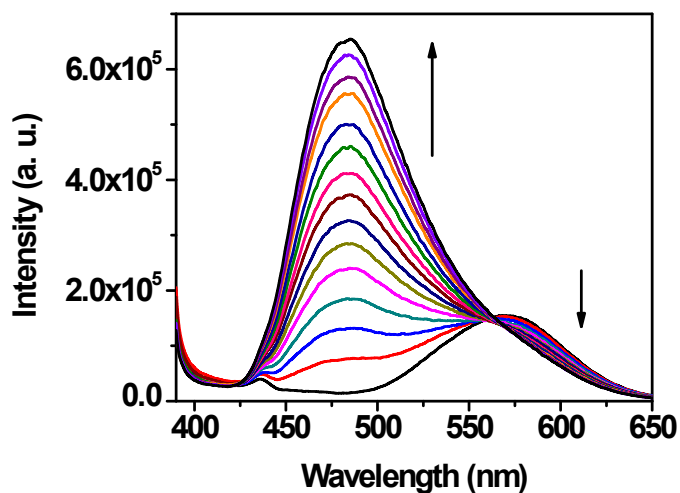

**Figure S21:** Fluorescence spectra of HBTP (10  $\mu\text{M}$ ) upon titration with  $\text{Al}^{3+}$  (0 to 3 equivalents) in 98% water (2% DMSO) solution.

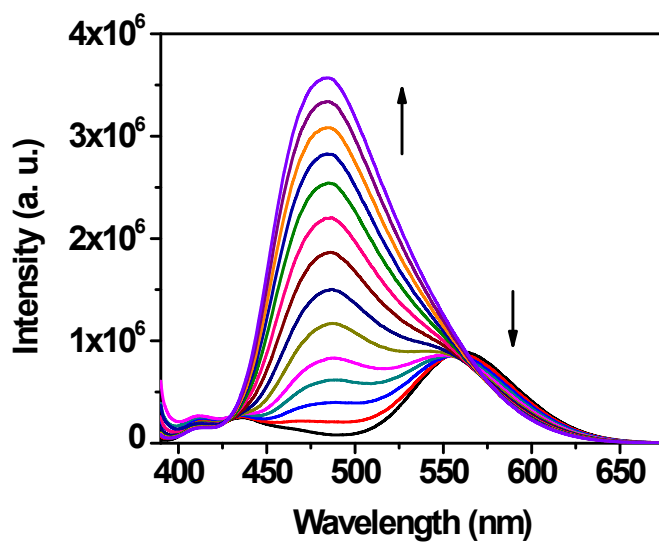

**Figure S22:** Fluorescence spectra of HBTP (10  $\mu\text{M}$ ) upon titration with  $\text{Al}^{3+}$  (0 to 3 equivalents) in 90% water (10% EtOH) solution.

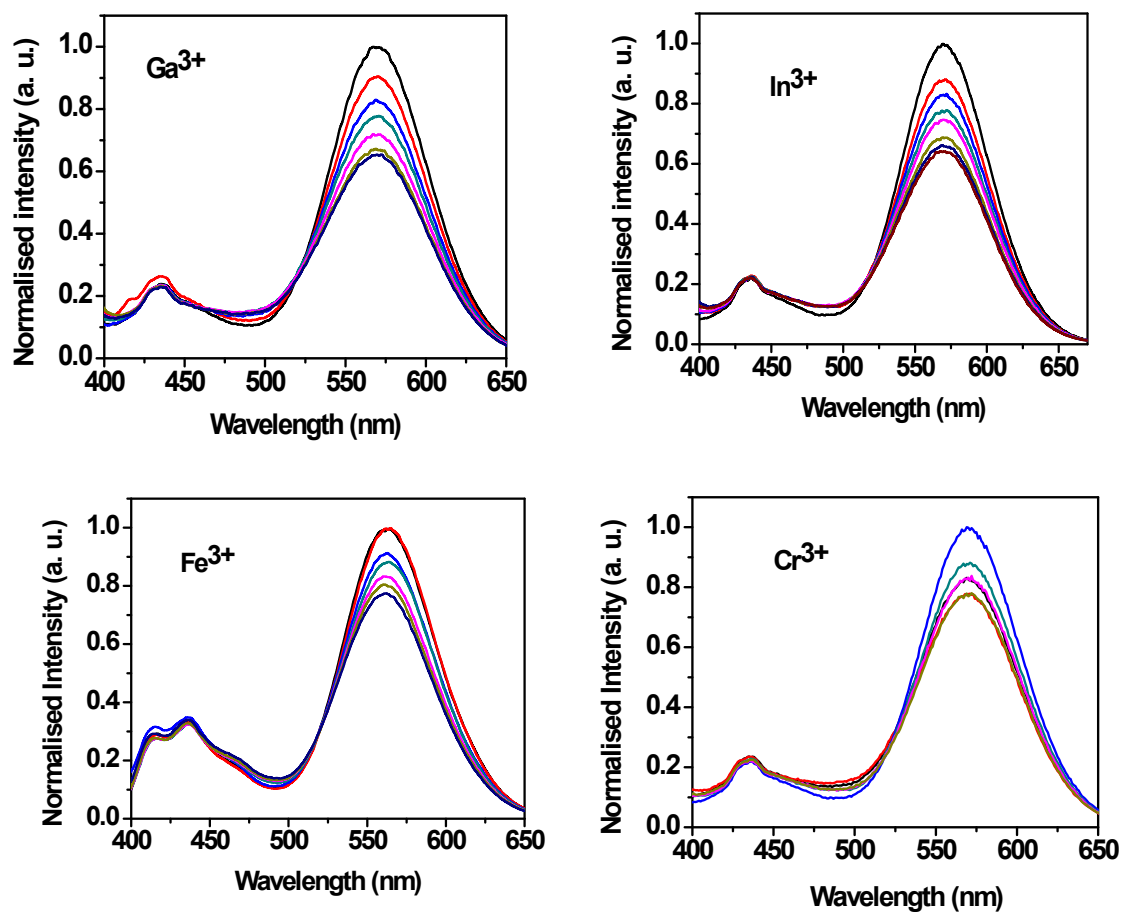

Figure S23: The change of fluorescence of HBTP in presence of different trivalent ions.

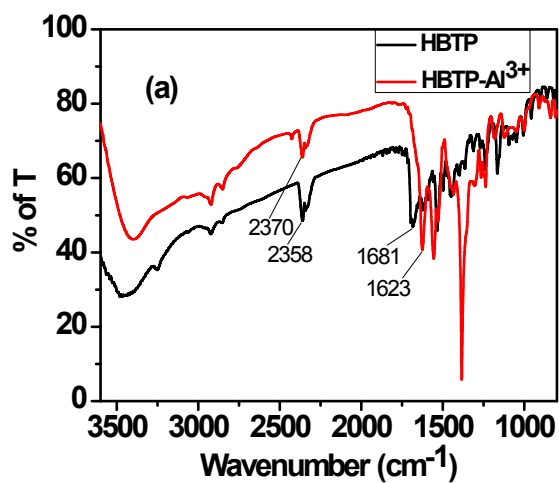



**Figure S24:** FT-IR spectrum of HBTP and HBTP-Al<sup>3+</sup>.

**Comparison of present probe with the existing probes:**

**Table S4: The comparison of the present probe with recently reported probes for Al<sup>3+</sup> have been outlined in this table**

| Fluorophore used                             | Type of response           | Selectivity                                             | Detection limit                                                                                             | Living cell imaging | Reference                                          |
|----------------------------------------------|----------------------------|---------------------------------------------------------|-------------------------------------------------------------------------------------------------------------|---------------------|----------------------------------------------------|
| 2-hydroxy naphthaldehyde                     | Colorimetric, fluorometric | Al <sup>3+</sup>                                        | 3.0 × 10 <sup>-7</sup> M and 1.0 × 10 <sup>-7</sup> M in ethanol and 0.1 M HEPES buffer respectively        | Yes                 | <i>Org. Biomol. Chem.</i> , 2011, <b>9</b> , 5523. |
| 1,2-dihydroxyanthraquinone                   | Colorimetric, fluorometric | Al <sup>3+</sup>                                        | 5.0 × 10 <sup>-7</sup> M                                                                                    | No                  | <i>Org. Lett.</i> , 2011, <b>13</b> , 5274.        |
| 1-naphthylamine and benzaldehyde,            | Colorimetric, fluorometric | Al <sup>3+</sup>                                        | 5 × 10 <sup>-5</sup> M                                                                                      | Yes                 | <i>Dalton Trans.</i> , 2015, <b>44</b> , 4576.     |
| Naphthalene                                  | Colorimetric, fluorometric | Al <sup>3+</sup>                                        | 57 nM                                                                                                       | No                  | <i>RSC Adv.</i> , 2013, <b>3</b> , 22572.          |
| Naphthalene                                  | Colorimetric, fluorometric | Al <sup>3+</sup>                                        | 1 × 10 <sup>-8</sup> M                                                                                      | Yes                 | <i>Analyst</i> , 2012, <b>137</b> , 2166.          |
| Pyridyl-salicylimine Schiff base derivatives | Colorimetric, fluorometric | Zn <sup>2+</sup> , Al <sup>3+</sup> and OH <sup>-</sup> | 1.69 × 10 <sup>-6</sup> M , 1.42 × 10 <sup>-6</sup> M and 1.27 × 10 <sup>-6</sup> M (for Al <sup>3+</sup> ) | No                  | <i>Analyst</i> , 2013, <b>138</b> , 2931.          |
| Salicylimine                                 | Colorimetric, fluorometric | Al <sup>3+</sup>                                        | 2.94 × 10 <sup>-8</sup> M                                                                                   | Yes                 | <i>Dalton Trans.</i> , 2015, <b>44</b> , 11352.    |
| Salicylaldehyde                              | Colorimetric, fluorometric | Zn <sup>2+</sup> and Al <sup>3+</sup>                   | 2.4 × 10 <sup>-7</sup> M (for Al <sup>3+</sup> )                                                            | Yes                 | <i>Dalton Trans.</i> , 2015, <b>44</b> , 11797.    |
| Hydroxybenzothiazole                         | Colorimetric, fluorometric | Al <sup>3+</sup>                                        | 6.72 × 10 <sup>-8</sup> M                                                                                   | Yes                 | This work                                          |

**References:**

1. Bruker. APEX2, SAINT and SADABS. Bruker AXS Inc., Madison, Wisconsin, USA.2009.
2. Sheldrick, G.M. A short history of SHELX. *Acta Cryst.*2008, A64, 112.
